# Supplementary material for: Continuous measurement of locomotor activity during convalescence and acclimation in group-housed rats
Source: PubMed Central journal article supplement — Exp Anim. 2019 Feb 13;68(3):277–83. doi: 10.1538/expanim.18-0097 (PMC6699979; doi:10.1538/expanim.18-0097), 2019-02-13
Supplement: expanim-68-277-s001.pdf [file expanim-68-277-s001.pdf]

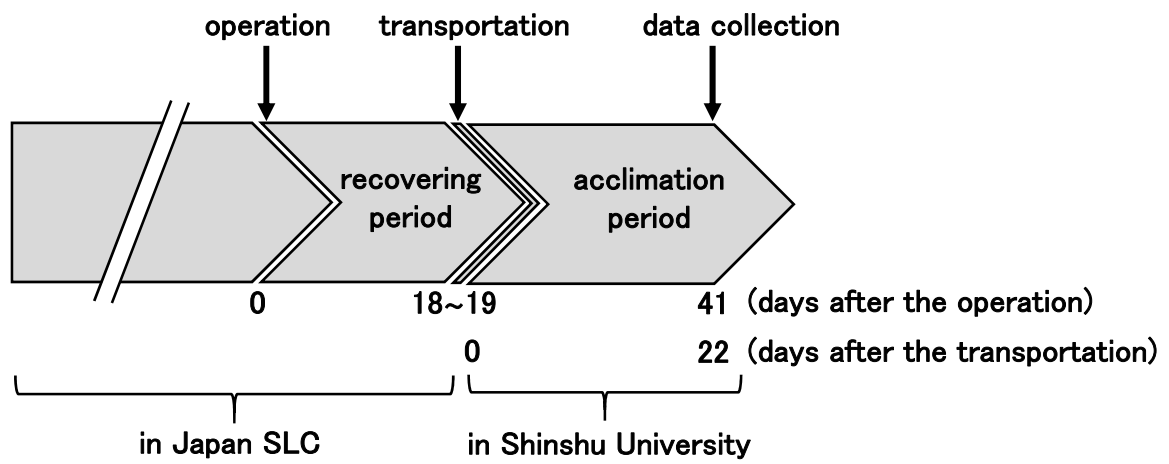

Supplementary Fig. 1. Time-course of the experiment.

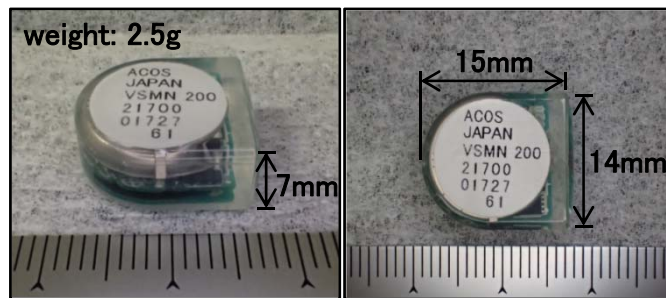

Supplementary Fig. 2. Appearance and weight of the nano tag®

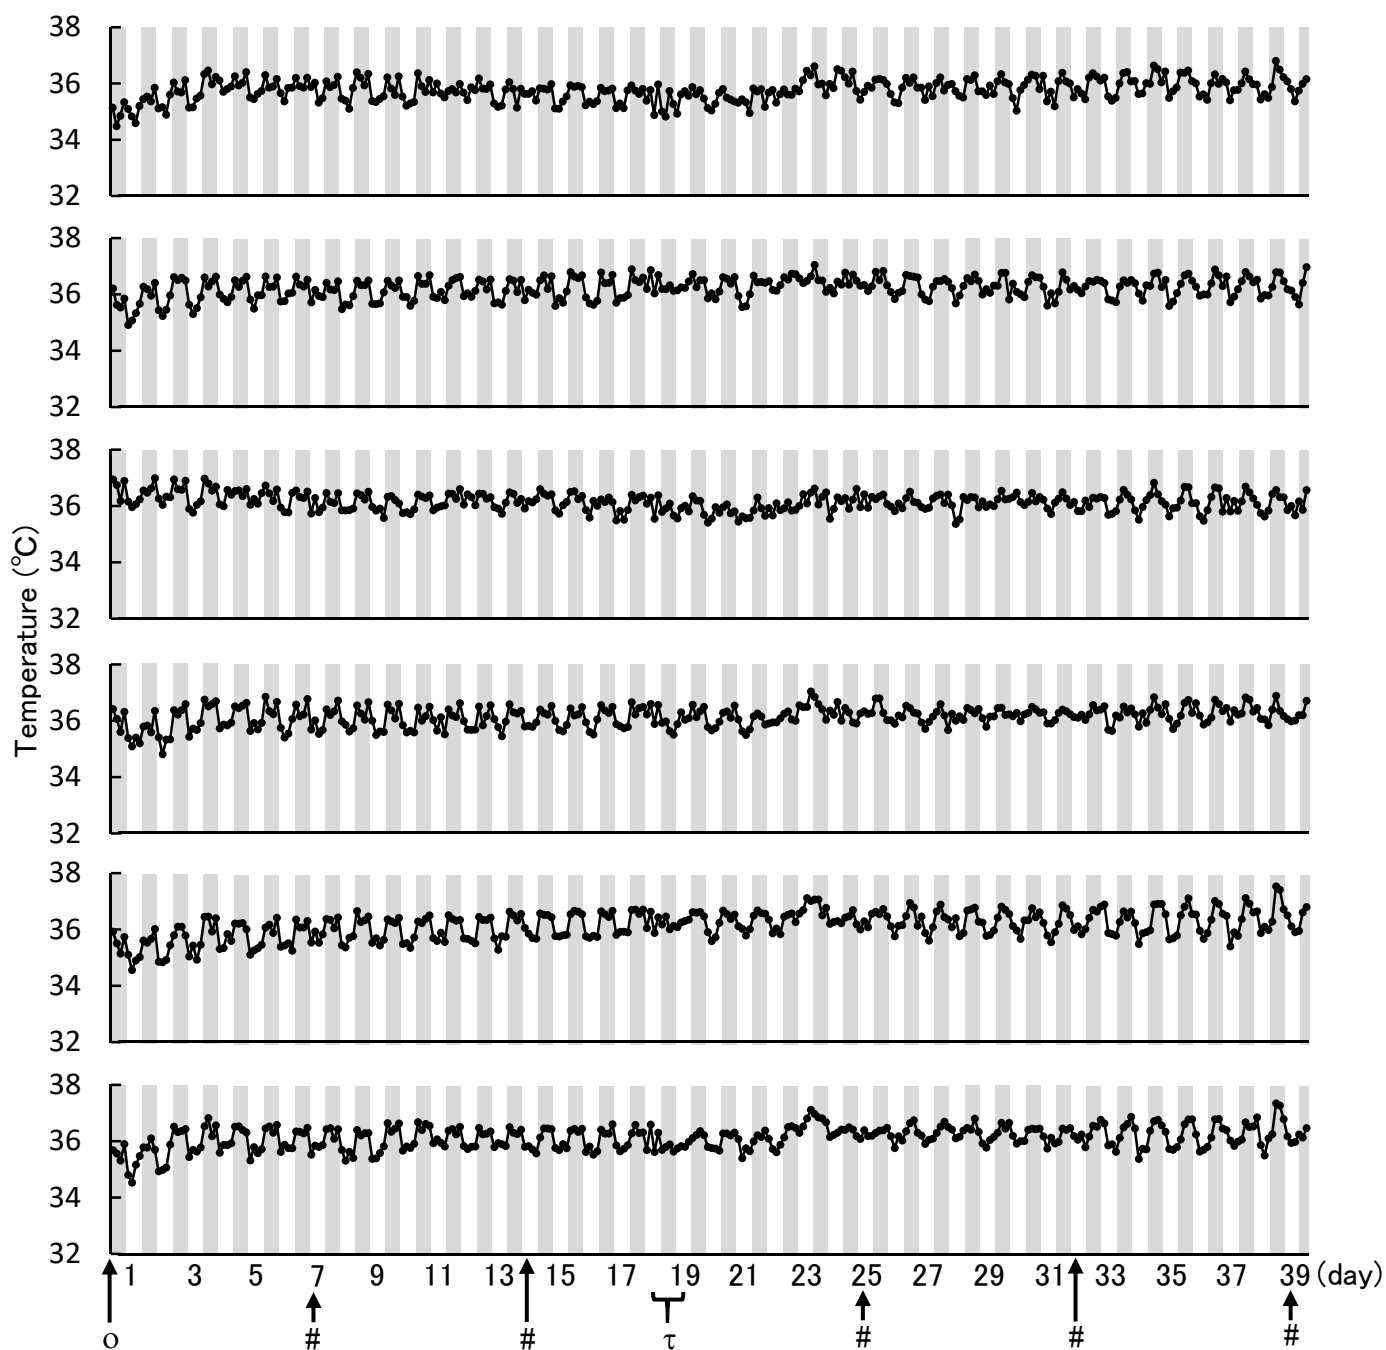

**Supplementary Fig. 3. Continuous temperature measurements for each rat during the convalescence and acclimation periods.**

Temperature of the device every 3 h. Dark-filled and non-filled areas in the graphs indicate the dark and light phases, respectively. The cross axle indicates the day after the operation. Each point is shown as o: operation; #: cage exchange;  $\tau$ : transportation.

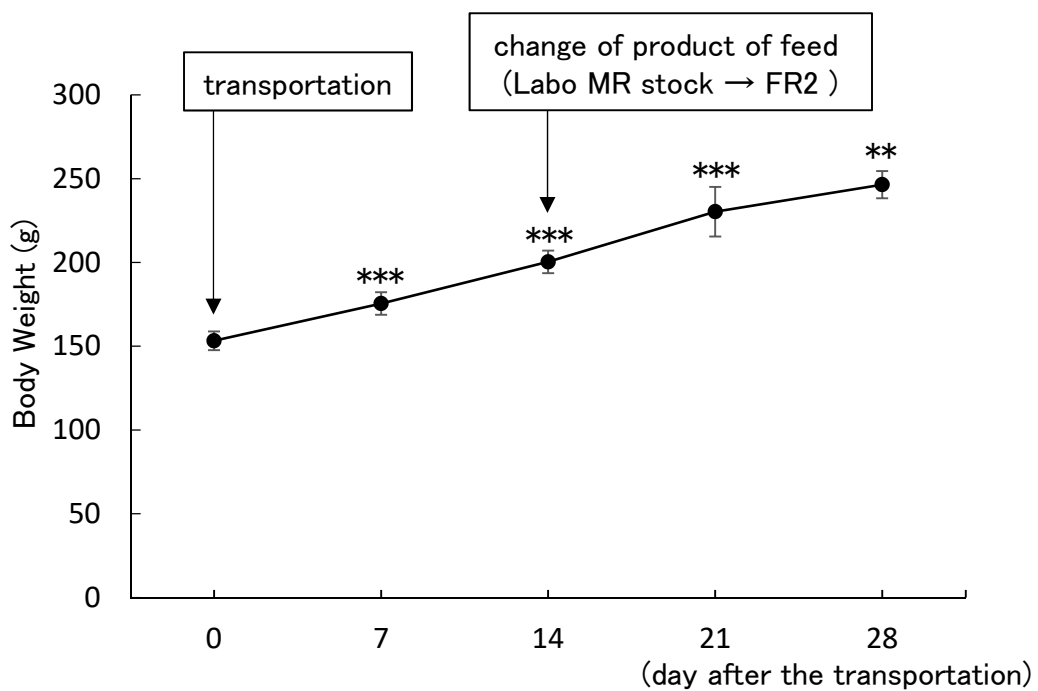

**Supplementary Fig. 4. Growth curve of the nano tag® non-implanted rats**

Body weight measurements during the experiment (means  $\pm$  SD). Nine male rats (F344/NSlc, 8 weeks of age, nano tag® non-implanted) were transported from Japan SLC to Shinshu University and then body weights were measured once a week. Product of feed was changed (Labo MR stock to FR2) in 14 days after the transit. \*\*:  $p < 0.01$ ; \*\*\*:  $p < 0.001$ , compared with each preceding measurement: Tukey-Kramer test. Each point  $n = 9$ .

**A**

|                   | P-value |
|-------------------|---------|
| day -7 vs. day 0  | P<0.001 |
| day -7 vs. day 7  | P<0.001 |
| day -7 vs. day 14 | P<0.001 |
| day -7 vs. day 18 | P<0.001 |
| day -7 vs. day 25 | P<0.001 |
| day -7 vs. day 32 | P<0.001 |
| day -7 vs. day 39 | P<0.001 |
| day 0 vs. day 7   | P<0.001 |
| day 0 vs. day 14  | P<0.001 |
| day 0 vs. day 18  | P<0.001 |
| day 0 vs. day 25  | P<0.001 |
| day 0 vs. day 32  | P<0.001 |
| day 0 vs. day 39  | P<0.001 |
| day 7 vs. day 14  | P<0.001 |
| day 7 vs. day 18  | P<0.001 |
| day 7 vs. day 25  | P<0.001 |
| day 7 vs. day 32  | P<0.001 |
| day 7 vs. day 39  | P<0.001 |
| day 14 vs. day 18 | P<0.05  |
| day 14 vs. day 25 | NS      |
| day 14 vs. day 32 | P<0.001 |
| day 14 vs. day 39 | P<0.001 |
| day 18 vs. day 25 | NS      |
| day 18 vs. day 32 | P<0.001 |
| day 18 vs. day 39 | P<0.001 |
| day 25 vs. day 32 | P<0.001 |
| day 25 vs. day 39 | P<0.001 |
| day 32 vs. day 39 | P<0.05  |

**B**

|                   | P-value |
|-------------------|---------|
| day 0 vs. day 7   | P<0.001 |
| day 0 vs. day 14  | P<0.001 |
| day 0 vs. day 21  | P<0.001 |
| day 0 vs. day 28  | P<0.001 |
| day 7 vs. day 14  | P<0.001 |
| day 7 vs. day 21  | P<0.001 |
| day 7 vs. day 28  | P<0.001 |
| day 14 vs. day 21 | P<0.001 |
| day 14 vs. day 28 | P<0.001 |
| day 21 vs. day 28 | P<0.01  |

**Supplementary Table 1. P-values of growth curves**

P-values of growth curve of rats after the operation (Fig. 5) (A) and growth curve of the nano tag® non-implanted rats (Supplementary Fig. 4) (B). Compared with each points: Tukey-Kramer test. Each point n=6 (A) or 9 (B).

|       | P-value of F-test |
|-------|-------------------|
| 9:00  | NS                |
| 10:00 | NS                |
| 11:00 | P<0.05            |
| 12:00 | P<0.05            |
| 13:00 | P<0.001           |
| 14:00 | NS                |
| 15:00 | P<0.05            |
| 16:00 | NS                |
| 17:00 | NS                |
| 18:00 | NS                |
| 19:00 | NS                |
| 20:00 | NS                |
| 21:00 | NS                |
| 22:00 | NS                |
| 23:00 | P<0.01            |
| 0:00  | NS                |
| 1:00  | NS                |
| 2:00  | NS                |
| 3:00  | NS                |
| 4:00  | P<0.05            |
| 5:00  | NS                |
| 6:00  | NS                |
| 7:00  | P<0.05            |
| 8:00  | P<0.05            |

**Supplementary Table 2. P-values of F-test about locomotor activity after cage exchange**

P-values of F-test about Fig. 4, compared between the same times on the day of cage exchange and 6 days after the event. P<0.05, P<0.01, and P<0.001 indicate different variances. Each group n = 6.
